# Supplementary figures and images for: Serious Games, Gamification, and Serious Mental Illness: A Scoping Review
Source: Atypon-hosted journal article supplement (doi:10.1176/appi.ps.201800567), 2019-10-23

Preferred Reporting of Items for Systematic Review and Meta-Analysis (PRISMA)

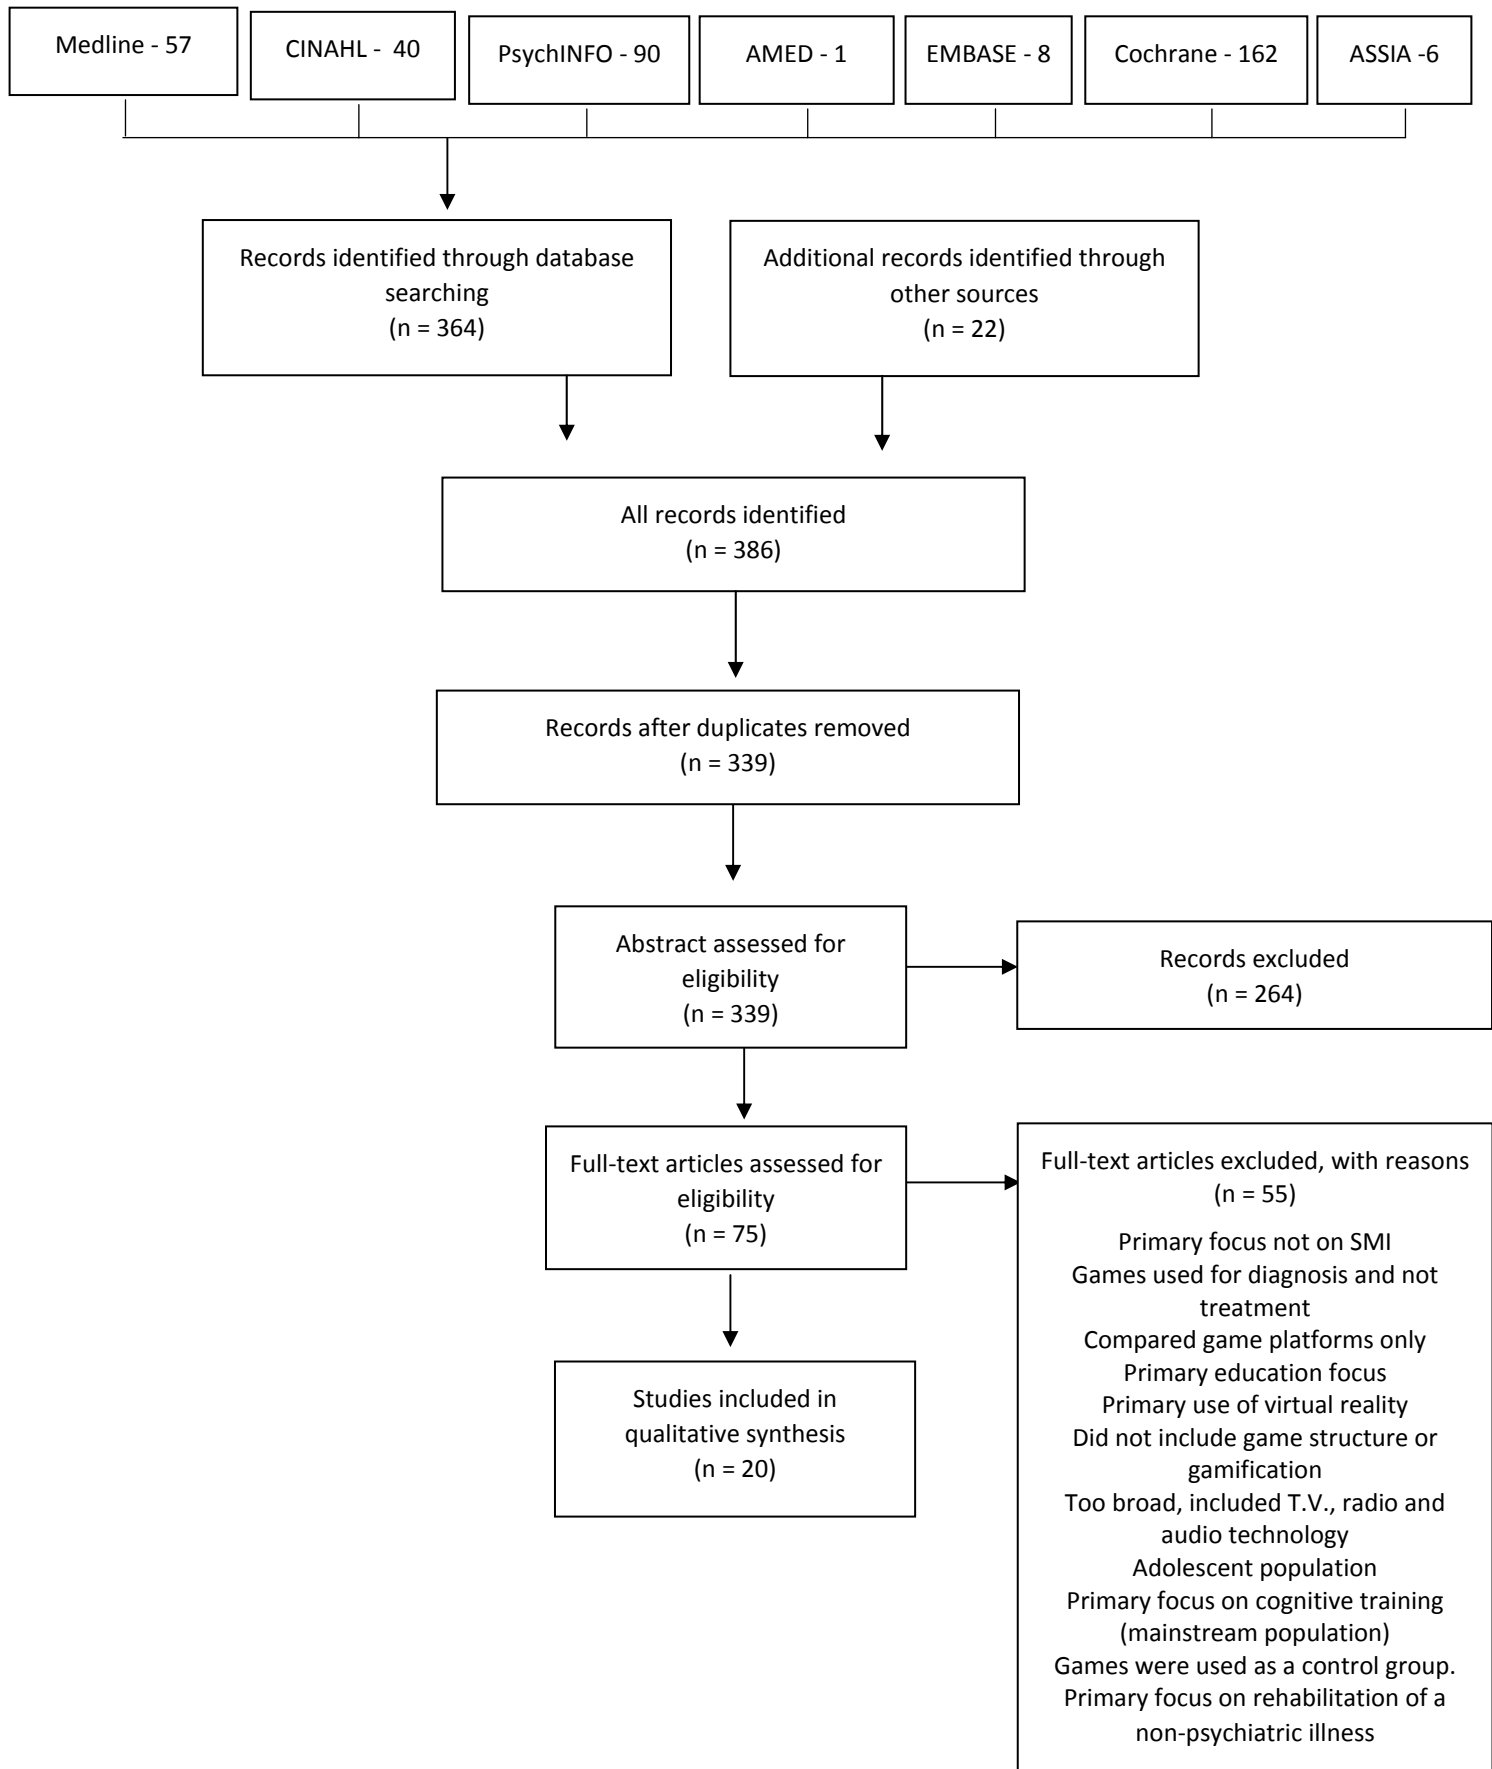

Supplement: appi.ps.201800567.ds001.pdf [file appi.ps.201800567.ds001.pdf]
